# Supplementary material for: Synergistic Effect of the MTHFR C677T and EPHX2 G860A Polymorphism on the Increased Risk of Ischemic Stroke in Chinese Type 2 Diabetic Patients
Source: Hindawi journal article supplement (doi:10.1155/2017/6216205), 2017-01-01
Supplement: f1 [file 6216205.f1.pdf]

Supplementary table 1. Effect of rs751141 and rs1801133 polymorphisms on homocysteine levels

| Genotype              | Hcy level (μmol/L)    | P <sup>a</sup> | β (SE) <sup>a</sup> |
|-----------------------|-----------------------|----------------|---------------------|
| MTHFRrs751141(n=626)  |                       |                |                     |
| CC                    | 11.77 ( 9.87, 14.78)  | .0497          | 0.57 (0.29)         |
| CT                    | 12.07 ( 9.88, 14.44)  |                |                     |
| TT                    | 12.80 ( 10.53, 15.80) |                |                     |
| EPHX2rs1801133(n=626) |                       |                |                     |
| GG                    | 12.20 ( 9.78, 14.92)  | .62            | 0.17 (0.34)         |
| GA                    | 12.56 ( 10.49, 14.94) |                |                     |
| AA                    | 11.38 ( 9.34, 14.67)  |                |                     |

<sup>a</sup>Adjusted for age, sex.
